# Supplementary material for: Spin-dependent Seebeck effect in zigzag-edge antimonene nanoribbons
Source: Royal Society of Chemistry journal article supplement (doi:10.1039/d4cp02713b), 2024-01-01
Supplement: d4cp02713b1.pdf [file d4cp02713b1.pdf]

# Supplemental Materials

## Spin-dependent Seebeck effect in zigzag-edge antimonene nanoribbons

Liyan Lin,<sup>1, 2</sup> Yue Jiang,<sup>3\*</sup> Xinyi Gao,<sup>1</sup> Yandong Guo,<sup>1, 2, 4\*</sup> Hongli Zeng,<sup>5</sup> and  
Xiaohong Yan<sup>1, 2, 5, 6, 7\*</sup>

<sup>1</sup>*College of Electronic and Optical Engineering, Nanjing University of Posts and  
Telecommunications, Nanjing 210046, China*

<sup>2</sup>*Key Laboratory of Radio Frequency and Micro-Nano Electronics of Jiangsu Province, Nanjing  
210023, China*

<sup>3</sup>*College of Science, Jinling Institute of Technology, Nanjing 211169, China*

<sup>4</sup>*New Energy Technology Engineering Laboratory of Jiangsu Province, Nanjing 210046, China*

<sup>5</sup>*College of Natural Science, Nanjing University of Posts and Telecommunications, Nanjing  
210046, China.*

<sup>6</sup>*College of Science, Nanjing University of Aeronautics and Astronautics, Nanjing 210016, China*

<sup>7</sup>*School of Material Science and Engineering, Jiangsu University, Zhenjiang, 212013, China*

**Table S1.** Formation energy of ZANRs width various widths.

| Structure             | ZANR4  | ZANR5  | ZANR6  | ZANR7  | ZANR8  | ZANR9 |
|-----------------------|--------|--------|--------|--------|--------|-------|
| $E_f(\text{eV/atom})$ | -0.319 | -0.314 | -0.266 | -0.229 | -0.196 |       |

The formation energy of the bare nanoribbons are calculated using the following formula [*Physica E 2018, 97, 98-104*]:

$$E_f = 1/N_{\text{Sb}} (E_{\text{bare}} - N_{\text{Sb}} E_{\text{Sb}})$$

Where  $N_{\text{Sb}}$  and  $E_{\text{Sb}}$  refer to the total number of antimony atoms and the energy of a single antimony atom in the bare ZANR, respectively.  $E_{\text{bare}}$  represents the total energy of the bare ZANR.

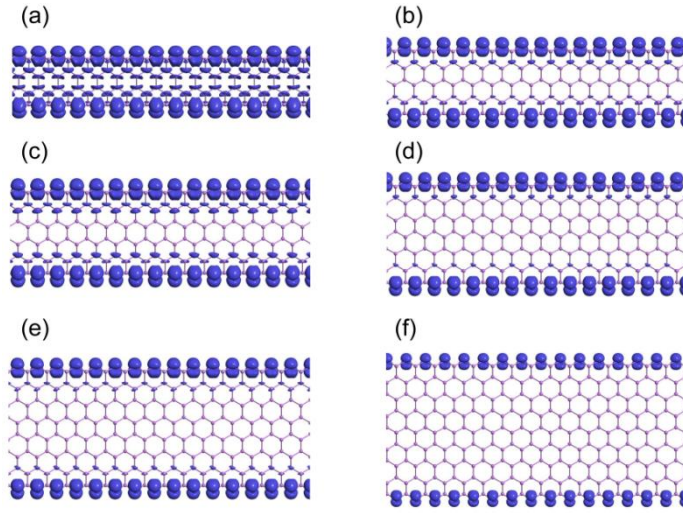

**Figure S1** (a-b) The spatial distribution of local density of states (LDOS) in ZANR with widths from 4 to 9. The value of isosurfaces is  $0.5\text{e-}7 \text{ \AA}^{-3} \text{ eV}^{-1}$  for spin difference density ( $\rho_{\uparrow}-\rho_{\downarrow}$ ).

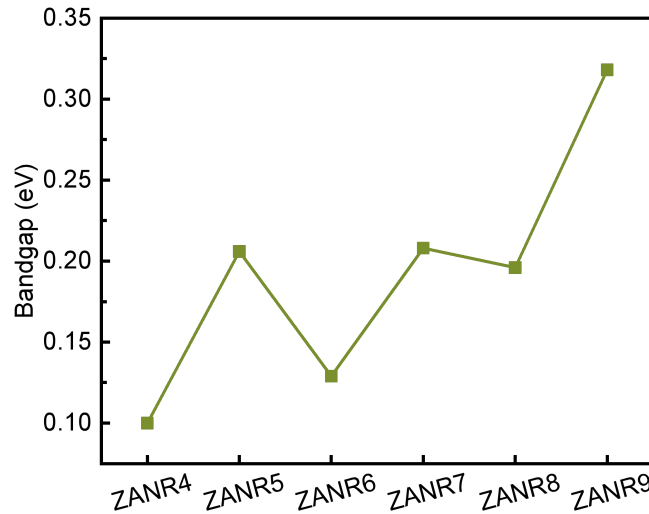

**Figure S2** The bandgap of ZANRs width various widths.
